# Supplementary material for: How plant neighborhood composition influences herbivory: Testing four mechanisms of associational resistance and susceptibility
Source: PLOS journal article supplement (doi:10.1371/journal.pone.0176499), 2017-05-09
Supplement: S3 (10.1371/journal.pone.0176499.s003) [file journal.pone.0176499.s003]

Kim 2017. How plant neighborhood composition influences herbivory: testing four mechanisms of associational resistance and susceptibility. PlosOne.

**S3 Table.** ANOVA tables for neighborhood composition effects on plant resistance: (A) constitutive and (B) induced resistance of *Solanum* to a specialist beetle, *Leptinotarsa juncta*.

| Variable                                  | A. Constitutive resistance |          |          | B. Induced resistance |          |          |
|-------------------------------------------|----------------------------|----------|----------|-----------------------|----------|----------|
|                                           | <i>DF</i>                  | <i>F</i> | <i>P</i> | <i>DF</i>             | <i>F</i> | <i>P</i> |
| Intercept                                 | 1                          | 27.98    | < 0.01   | 1                     | 15.28    | <0.01    |
| Total density                             | 1                          | 1.23     | 0.28     | 1                     | 0.63     | 0.44     |
| Plant genotype                            | 3                          | 3.41     | 0.02     | 3                     | 7.96     | <0.01    |
| <i>Solidago</i> frequency                 | 1                          | 4.56     | 0.03     | 1                     | 4.33     | 0.05     |
| <i>Solanum</i> density                    | 1                          | 2.64     | 0.19     | 1                     | 1.87     | 0.19     |
| Total density: Plant genotype             | 3                          | 3.59     | 0.06     | 3                     | 3.18     | 0.06     |
| <i>Solidago</i> frequency: Plant genotype | 3                          | 4.49     | 0.04     | 3                     | 4.38     | 0.02     |
| <i>Solanum</i> density: Plant genotype    | 3                          | 3.22     | 0.01     | 3                     | 3.56     | 0.04     |
