# Supplementary material for: How plant neighborhood composition influences herbivory: Testing four mechanisms of associational resistance and susceptibility
Source: PLOS journal article supplement (doi:10.1371/journal.pone.0176499), 2017-05-09
Supplement: S4 (10.1371/journal.pone.0176499.s004) [file journal.pone.0176499.s004]

## S1 Text. Neighborhoods used for pair-wise preference experiments.

Neighborhoods used for pair-wise preference experiments. Neighborhoods denoted as “X,Y “. X is the number of *Solanum*, Y is the number of *Solidago* (see Fig. 2 for response surface). Four types of comparisons were made to examine which component of the neighborhood influenced preference. (A) First, to examine how plant density influenced neighborhood preference, I used neighborhoods where total plant densities were held constant at 4 or 16 individual plants (“low” and “high” total densities, respectively) but the densities of *Solanum* and *Solidago* varied (a substitutive design comparison at two total density levels). For each paired treatment, preference for a particular neighborhood type was recorded. A substitutive design comparison allowed me to determine whether variation in plant density influenced preference but cannot tell me whether preference is due to the density of *Solanum* or *Solidago* because both are changing simultaneously. To overcome this, I made another set of pairwise neighborhood comparisons (B) where densities of *Solanum* remained fixed at either one, four, and eight individuals and compared to neighborhoods with the same amount of *Solanum* but the density of *Solidago* varied at 15, 12, and 8 individuals respectively. Because this additive design comparison kept the density of *Solanum* constant but varied the density of *Solidago*, I was able to determine whether preference was due to *Solidago* density. Again, for each paired treatment, preference for a particular neighborhood type was recorded. Finally, because paired neighborhoods in the previous additive comparisons also varied in size (thus confounding total density and the density *Solidago*), a third set of pair-wise comparisons was made between monocultures of varying sizes (one, four, 16 individuals) to determine if neighborhood size alone influenced preference. For each paired treatment, preference for a particular neighborhood type was recorded.

### **A. Substitutive comparisons (fixed total density)**

#### *Low density (4 individuals)*

|     |     |     |
|-----|-----|-----|
| 4,0 | vs. | 2,2 |
| 2,2 | vs. | 1,3 |
| 1,3 | vs. | 4,0 |

#### *High density (16 individuals)*

|      |     |      |
|------|-----|------|
| 16,0 | vs. | 8,8  |
| 8,8  | vs. | 1,15 |
| 1,15 | vs. | 16,0 |

### **B. Additive comparisons (fixed *Solanum* densities)**

| <i>Monoculture</i> |     | <i>Diculture</i> |
|--------------------|-----|------------------|
| 1,0                | vs. | 1,15             |
| 4,0                | vs. | 4,12             |
| 8,0                | vs. | 8,8              |

### **C. Neighborhood size (monoculture of *Solanum* only)**

|      |     |      |
|------|-----|------|
| 1,0  | vs. | 4,0  |
| 4,0  | vs. | 16,0 |
| 16,0 | vs. | 1,0  |
